# Supplementary material for: Internal modulation of proteolysis in vascular extracellular matrix remodeling: role of ADAM metallopeptidase with thrombospondin type 1 motif 5 in the development of intracranial aneurysm rupture
Source: publisher site journal article supplement (doi:10.18632/aging.202948), 2021-05-02
Supplement: Supplementary file [file aging-v13i9-202948-supplementary-material-SD1.pdf]

SUPPLEMENTARY FIGURES

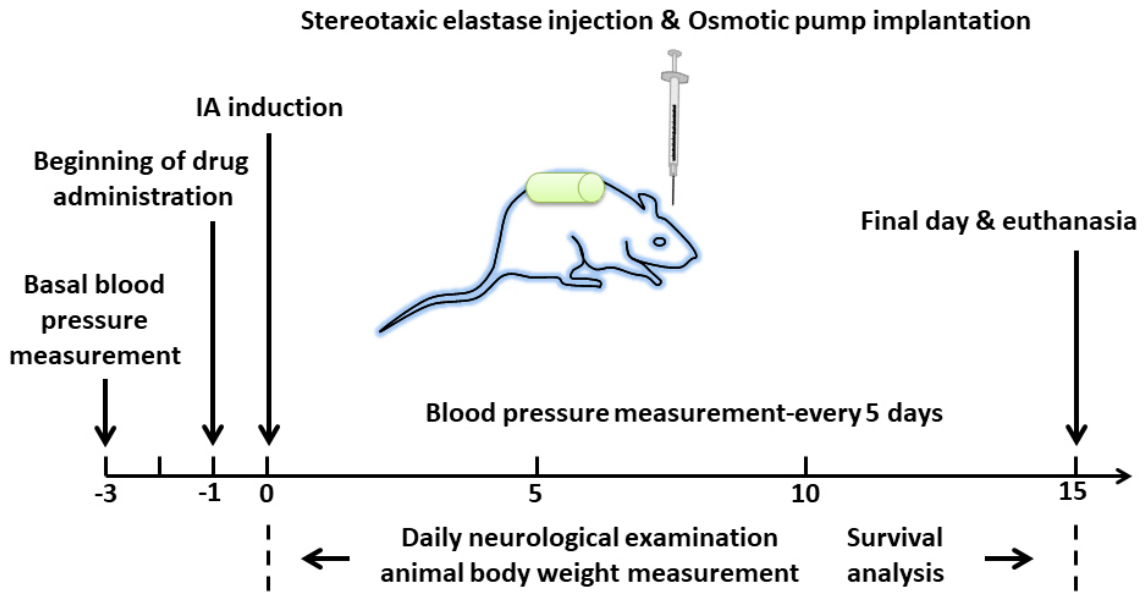

**Supplementary Figure 1. Experimental protocol for IA induction.** Male mice maintained with systemic hypertension induced by a chronic infusion of angiotensin II, meanwhile, also received a single stereotaxic injection of elastase to induce IAs. A neurological evaluation score during the next 15 days was used to identify symptomatic and asymptomatic IA mice.

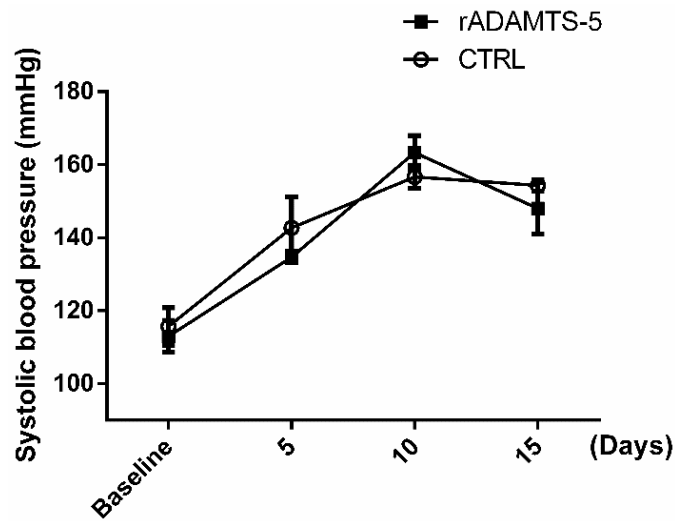

**Supplementary Figure 2. Blood pressure assessment.**

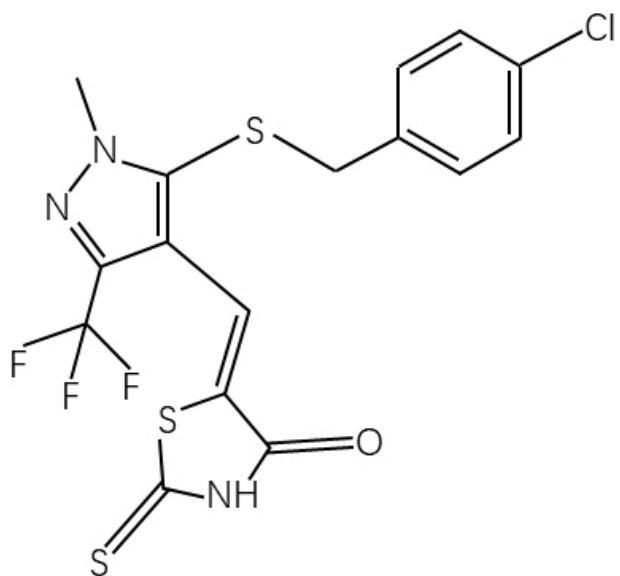

**Supplementary Figure 3. The chemical structure of ADAMTS-5 inhibitor.** Chemical name: (Z)-5-((5-((4-chlorobenzyl)thio)-1-methyl-3-(trifluoromethyl)-1H-pyrazol-4-yl)methylene)-2-thioxothiazolidin-4-one.
